# Supplementary material for: Conservation of the Stokes–Einstein relation in supercooled water
Source: Royal Society of Chemistry journal article supplement (doi:10.1039/d1cp03972e), 2021-01-01
Supplement: d1cp03972e1.pdf [file d1cp03972e1.pdf]

# Supplementary Information for

## Conservation of the Stokes-Einstein Relation in Supercooled Water

Gan Ren, Yanting Wang\*

\*Corresponding author. Email: [wangyt@itp.ac.cn](mailto:wangyt@itp.ac.cn)

### 1. Simulation details for the Jagla model

The initial configuration for the Jagla fluid model<sup>1-3</sup> consists of 1728 molecules with a constant box size determined under a constant pressure  $P = 153.33$  bar at each temperature. Although the reduced unit is usually adopted when using the Jagla fluid model, we use the SI unit instead by assigning the unit of hardcore diameter  $d = 0.3$  nm, that of potential  $U_0 = 100k_B$ , and that of pressure  $P_0 = U_0 / d^3$ . All our molecular dynamics (MD) simulations were performed with the GROMACS MD simulation package<sup>4, 5</sup> and the periodic boundary conditions were applied in all three directions of the Cartesian space. The van der Waals interactions were calculated directly with a truncated spherical cutoff of 1.0 nm. Twenty-four temperatures simulated with the Jagla model are in the range of 30–140 K. The system temperature was kept a constant by the Nosé-Hoover thermostat<sup>6, 7</sup> and the pressure was controlled by the Parrinello-Rahman barostat.<sup>8, 9</sup> The simulation time step is 1 fs and the total simulated time for each case ranges from 0.1 to 10 ns depending on the temperature. The  $k$  values within 2.5–14.5 nm<sup>-1</sup> with an interval of 1 nm<sup>-1</sup> for the Jagla fluid model are adopted to investigate the  $k$  dependences of  $D : \tau^{-1}$  and  $D : T/k$ . The viscosity  $\eta = \Delta p / Vq^2$  of Jagla is evaluated by  $A/Vl$  because the box size  $l$  is different at different temperatures.

### 2. Supplementary Figures

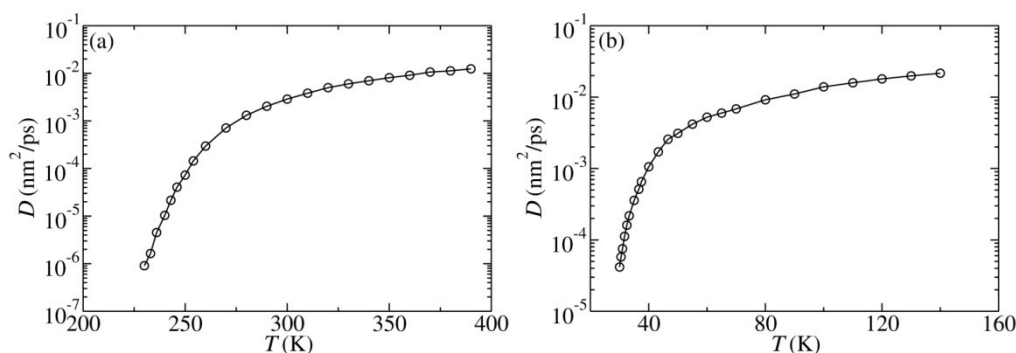

**Fig. S1** The diffusion constant  $D$  as a function of temperature  $T$  within 240–390 K for TIP5P (a) and within 30–140 K for Jagla (b).

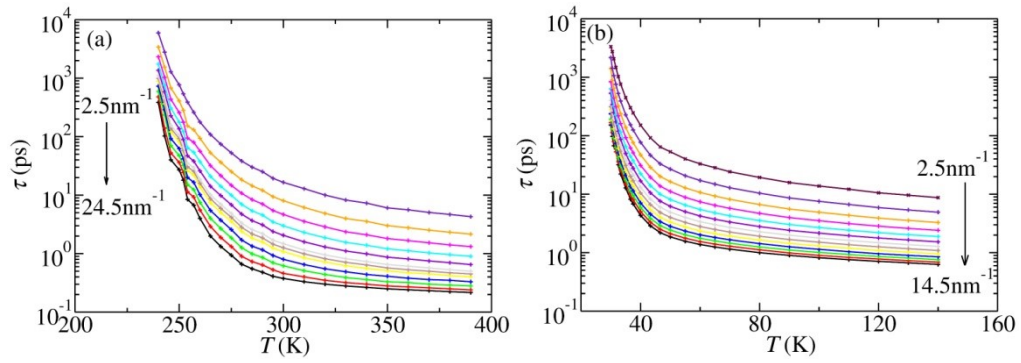

**Fig. S2** The structural relaxation time  $\tau$  for various  $k$  values as a function of temperature  $T$  for TIP5P (a) and for Jagla (b). The interval between two adjacent  $k$  values is  $2 \text{ nm}^{-1}$  for TIP5P and  $1 \text{ nm}^{-1}$  for Jagla.

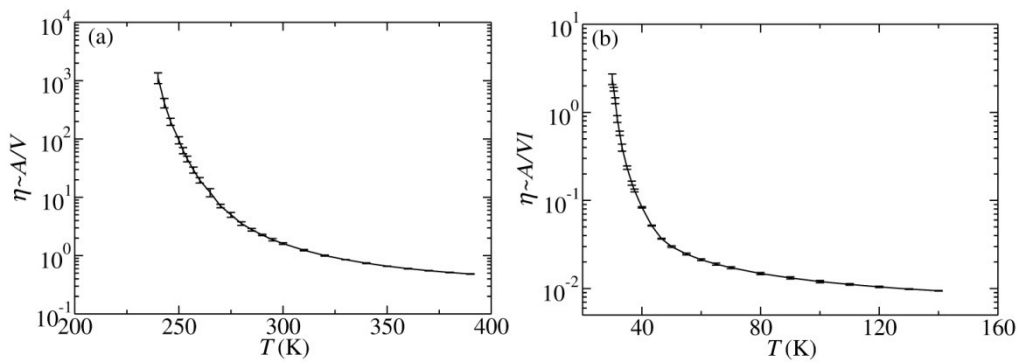

**Fig. S3** The viscosity  $\eta$  as a function of temperature  $T$  for TIP5P (a) and Jagla (b).

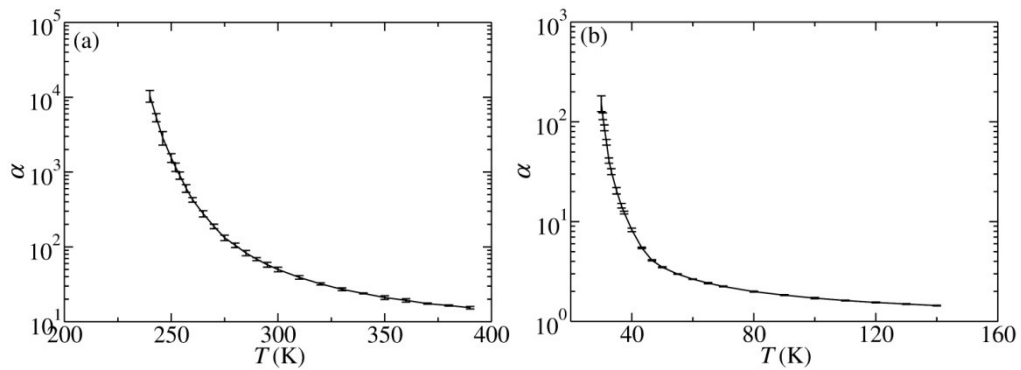

**Fig. S4** The frictional coefficient  $\alpha$  as a function of temperature  $T$  for TIP5P (a) and Jagla (b).

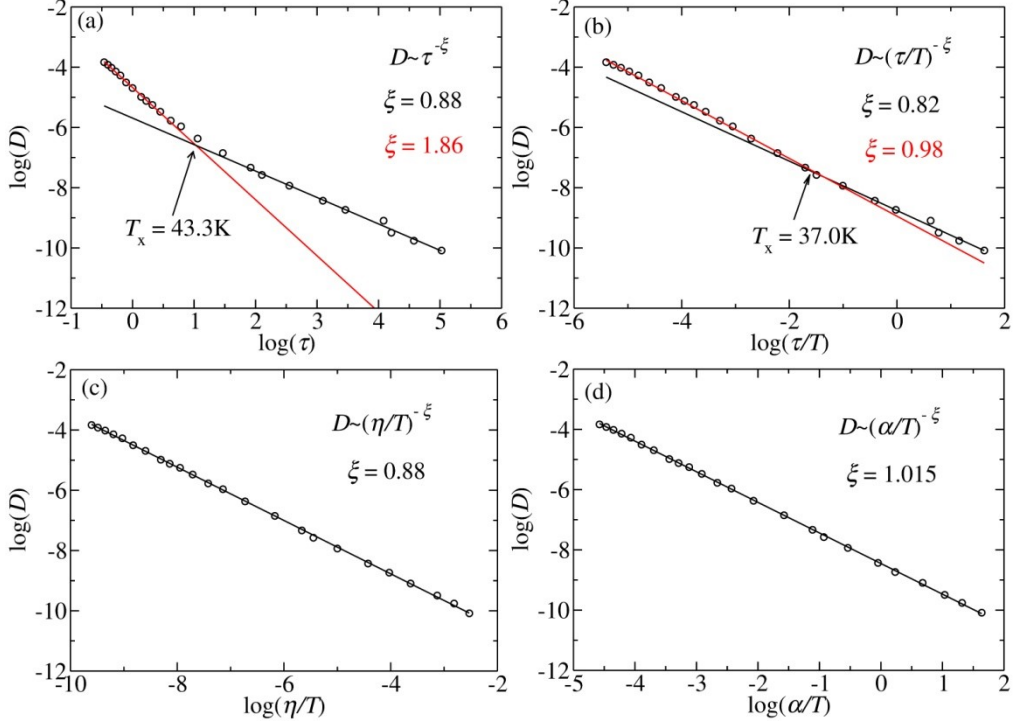

**Fig. S5** Verification of the validities of the original SE relation  $D : \tau^{-1}$  (a) and its three variants  $D : T/\tau$  (b),  $D : T/\eta$  (c), and  $D : T/\alpha$  (d) for the Jagla fluid model.  $\tau$  is calculated with the first maximum of static structure factor  $k = 12.5 \text{ nm}^{-1}$ . The calculated data are represented by circles and fitted by  $D : \tau^{-\xi_1}$ ,  $D : (\tau/T)^{-\xi_2}$ ,  $D : (\eta/T)^{-\xi_3}$ , and  $D : (\alpha/T)^{-\xi_4}$ , respectively. The fitted exponent  $\xi$  is written in the same color as the corresponding solid fitting line.

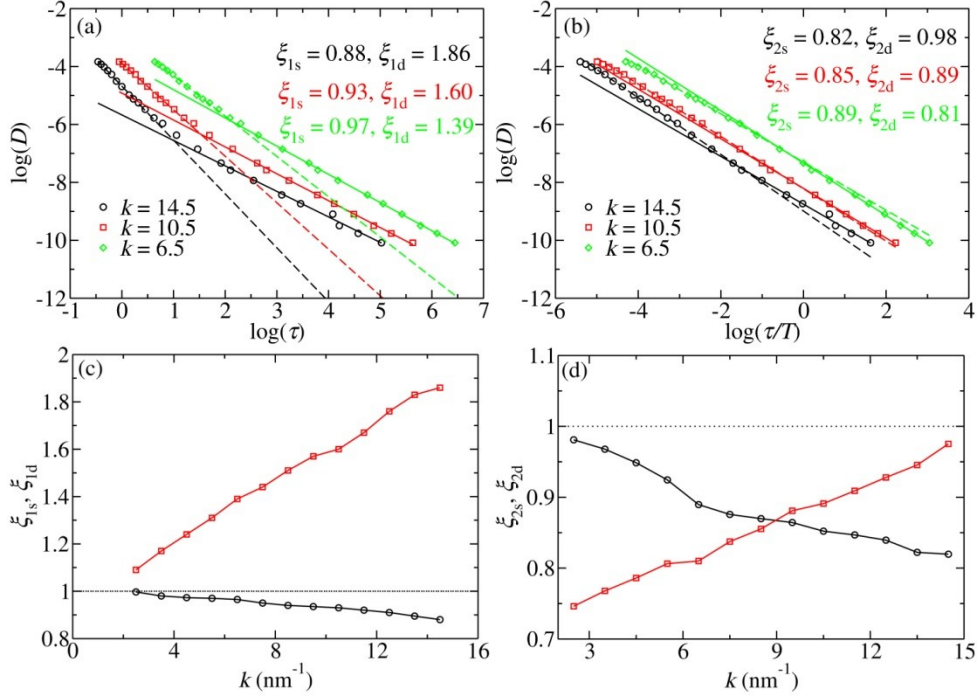

**Fig. S6** Fitting of the  $k$ -dependent exponent  $\xi_1$  by  $D : \tau^{-\xi_1}$  (a) and  $\xi_2$  by  $D : (\tau/T)^{-\xi_2}$  for Jagla (b), as well as

$\zeta_1$  vs.  $k$  (c) and  $\zeta_2$  vs.  $k$  (d). In (a) and (b), the calculated data are represented by different symbols and the fitted exponent is written in the same color as the corresponding fitting line;  $\zeta_{1s}, \zeta_{2s}$  values correspond to solid lines and  $\zeta_{1d}, \zeta_{2d}$  values correspond to dotted lines. In (c) and (d), black circles represent  $\zeta_{1s}, \zeta_{2s}$  and red squares are  $\zeta_{1d}, \zeta_{2d}$ .

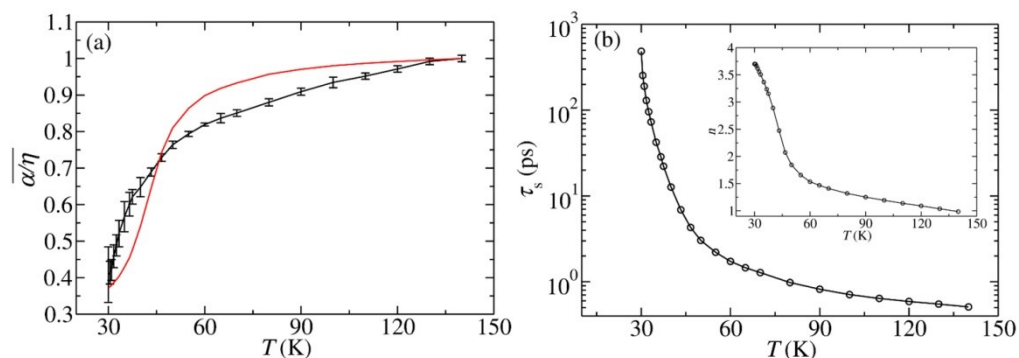

**Fig. S7** (a) Effective hydrodynamic radius rescaled by the value at  $T = 140$  K  $\overline{\alpha/\eta}$  vs.  $T$  for the Jagla model. The black line is the simulated result and the red one is the fitted result with  $\tau_0 = 19$  ps. (b) Residence correlation time  $\tau_s$  and coordination number  $n$  (inset) of the first solvation shell vs.  $T$  for the Jagla fluid model.

#### References

- 1 E. A. Jagla, *J. Chem. Phys.*, 1999, **111**, 8980-8986.
- 2 E. A. Jagla, *Phys. Rev. E*, 2001, **63**, 061509.
- 3 E. A. Jagla, *J. Phys.: Condens. Matter*, 1999, **11**, 10251-10258.
- 4 H. J. C. Berendsen, D. van der Spoel and R. van Drunen, *Comput. Phys. Commun.*, 1995, **91**, 43-56.
- 5 D. Van Der Spoel, E. Lindahl, B. Hess, G. Groenhof, A. E. Mark and H. J. Berendsen, *J. Comput. Chem.*, 2005, **26**, 1701-1718.
- 6 S. Nosé, *J. Chem. Phys.*, 1984, **81**, 511-519.
- 7 W. G. Hoover, *Phys. Rev. A*, 1985, **31**, 1695-1697.
- 8 M. Parrinello and A. Rahman, *J. Appl. Phys.*, 1981, **52**, 7182-7190.
- 9 S. Nosé and M. L. Klein, *Mol. Phys.*, 1983, **50**, 1055-1076.
